# Supplementary material
Source: Springer Nature journal article supplement (https://www.springerprofessional.de/resource/supplementary/13174_2012_3_MOESM3_ESM.pdf/10784746)

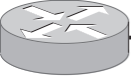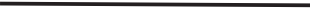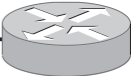

**RV1**

2 cores

**EV1**

25Mb/s

**RV2**

2 cores

Supplement: MOESM3 [file 10784746]
